# Supplementary material for: Residual cardiovascular risk in individuals on lipid-lowering treatment: quantifying absolute and relative risk in the community
Source: PubMed Central journal article supplement — Open Heart. 2018 Jan 26;5(1):e000722. doi: 10.1136/openhrt-2017-000722 (PMC5786911; doi:10.1136/openhrt-2017-000722), 2018-01-26
Supplement: openhrt-2017-000722supp001.pdf [file openhrt-2017-000722supp001.pdf]

## Online Supplemental Material

### Content

|                                                                                                                         |   |
|-------------------------------------------------------------------------------------------------------------------------|---|
| Supplemental Methods .....                                                                                              | 2 |
| Laboratory measurements .....                                                                                           | 2 |
| Ultrasound of the carotid artery.....                                                                                   | 2 |
| Adjudication of incident CVD events .....                                                                               | 2 |
| Supplemental Tables .....                                                                                               | 3 |
| Supplemental Table 1. Baseline characteristics of the subclinical disease sample (n=2917), stratified by LDL group..... | 3 |
| Supplemental Table 2. Detailed information regarding individuals on lipid-lowering treatment (LLT)..                    | 5 |
| Supplemental Figure.....                                                                                                | 6 |
| Supplemental Figure 1. 10-year probability of a CVD event according to LDL group (baseline risk) ....                   | 6 |
| Supplemental References .....                                                                                           | 7 |

## **Supplemental Methods**

### **Laboratory measurements**

Lipid traits, including blood levels of total cholesterol, high-density lipoprotein (HDL) cholesterol and triglycerides were measured in fasting participants using standardized assays. LDL-C was calculated using the Friedewald formula in individuals with triglyceride levels < 400 mg/dL.<sup>1</sup> CRP levels were determined using a nephelometer (Dade Behring BN100) and BNP levels were measured with a high-sensitivity immunoradiometric assay (Shionogi, Japan). The inter-assay coefficients of variation were 2.2% (CRP) and 12.2% (BNP), respectively.<sup>2</sup>

### **Ultrasound of the carotid artery**

Images were obtained at three sites (at the carotid bulb, at the proximal internal carotid artery [ICA] and at the distal common carotid artery [CCA]) on both, the left and the right carotid arteries. Mid- and far-wall measurements were obtained at each site by a single reader and used to calculate intima media thickness (IMT), as described in detail elsewhere.<sup>3</sup> The reproducibility of the carotid IMT measurement was good, as previously reported, with intraclass correlation coefficients ranging from 0.74 (mean ICA IMT) to 0.90 (maximum CCA IMT).<sup>4</sup>

### **Adjudication of incident CVD events**

Framingham participants are under regular surveillance for new-onset CVD events. All relevant information regarding incident events is reviewed by a panel of three physicians who adjudicate CVD events using standardized criteria. CVD was defined as myocardial infarction (fatal and nonfatal), angina, coronary insufficiency (acute coronary syndrome), peripheral vascular disease (intermittent claudication), cerebrovascular events (stroke or transient ischemic attack), and heart failure, consistent with prior publications.<sup>5</sup>

## Supplemental Tables

**Supplemental Table 1.** Baseline characteristics of the subclinical disease sample (n=2917), stratified by LDL group

| LDL (in mg/dL) group                           | Total          | 100≤LDL<130   |              |               |               | LDL≥130      |
|------------------------------------------------|----------------|---------------|--------------|---------------|---------------|--------------|
|                                                | subclinical    | LDL<100 mg/dl | mg/dl        | LDL<130 mg/dl | LDL≥130 mg/dl | mg/dl        |
|                                                | disease sample | No treatment  | No treatment | On treatment  | No treatment  | On treatment |
|                                                |                | (n=528)       | (n=899)      | (n=167)       | (n=1192)      | (n=131)      |
| <b>Clinical and biochemical features</b>       |                |               |              |               |               |              |
| Age, years; mean ± SD                          | 58.4 ± 9.6     | 56.3 ± 9.7    | 57.9 ± 9.8   | 63.7 ± 8.6    | 58.5 ± 9.3    | 62.9 ± 7.4   |
| Women, n (%)                                   | 1613 (55.3)    | 337 (63.8)    | 485 (53.9)   | 73 (43.7)     | 644 (54.0)    | 74 (56.5)    |
| LDL cholesterol, mg/dL; mean ± SD              | 127.9 ± 33.3   | 83.6 ± 13.0   | 115.8 ± 8.4  | 104.3 ± 18.9  | 156.7 ± 22.3  | 157.2 ± 23.7 |
| HDL cholesterol, mg/dL; mean ± SD              | 52.0 ± 16.0    | 58.1 ± 19.9   | 52.2 ± 15.9  | 44.9 ± 13.3   | 50.7 ± 13.9   | 47.5 ± 11.6  |
| Total cholesterol, mg/dL; mean ± SD            | 205.8 ± 37.0   | 163.1 ± 22.7  | 192.6 ± 18.4 | 182.3 ± 26.2  | 234.4 ± 26.9  | 237.9 ± 30.5 |
| Lipid-lowering treatment, n (%)                | 298 (10.2)     | 0 (0.0)       | 0 (0.0)      | 167 (100.0)   | 0 (0.0)       | 131 (100.0)  |
| Statin treatment, n (%)                        | 221 (7.6)      | 0 (0.0)       | 0 (0.0)      | 137 (82.0)    | 0 (0.0)       | 84 (64.1)    |
| Systolic BP, mmHg; mean ± SD                   | 127.8 ± 18.7   | 123.0 ± 18.0  | 126.7 ± 18.4 | 137.0 ± 19.6  | 128.7 ± 18.3  | 133.5 ± 18.0 |
| Diastolic BP, mmHg; mean ± SD                  | 75.6 ± 9.4     | 73.5 ± 9.5    | 75.2 ± 9.1   | 76.3 ± 9.2    | 76.4 ± 9.5    | 77.7 ± 9.3   |
| BP-Treatment, n (%)                            | 708 (24.3)     | 83 (15.7)     | 222 (24.7)   | 97 (58.1)     | 251 (21.1)    | 55 (42.0)    |
| Body mass index, kg/m <sup>2</sup> ; mean ± SD | 27.8 ± 5.2     | 26.6 ± 5.2    | 27.8 ± 5.4   | 29.4 ± 4.9    | 28.1 ± 5.1    | 28.6 ± 4.3   |
| Smoking, n (%)                                 | 426 (14.6)     | 71 (13.5)     | 122 (13.6)   | 14 (8.4)      | 197 (16.5)    | 22 (16.8)    |
| Diabetes, n (%)                                | 220 (7.5)      | 32 (6.1)      | 64 (7.1)     | 37 (22.2)     | 67 (5.6)      | 20 (15.3)    |

|                                         |                 |                 |                 |                  |                 |                 |
|-----------------------------------------|-----------------|-----------------|-----------------|------------------|-----------------|-----------------|
| BNP, pg/mL, median (Q1, Q3)*            | 7.8 (4.0, 16.9) | 8.8 (4.0, 19.6) | 8.2 (4.0, 18.7) | 10.2 (4.0, 22.5) | 6.8 (4.0, 14.6) | 8.9 (4.0, 16.6) |
| CRP, mg/L, median (Q1, Q3) <sup>†</sup> | 2.0 (0.9, 4.5)  | 1.8 (0.7, 4.9)  | 1.8 (0.8, 3.9)  | 2.4 (1.0, 4.9)   | 2.1 (1.0, 4.6)  | 2.8 (1.2, 4.8)  |
| Carotid US abnormalities, n (%)         | 793 (27.2)      | 99 (18.8)       | 205 (22.8)      | 84 (50.3)        | 350 (29.4)      | 55 (42.0)       |

LDL indicates low-density lipoprotein; HDL, high-density lipoprotein; BP, blood pressure; SD, standard deviation; BNP, B-type natriuretic peptide; CRP, C-reactive protein; US, ultrasound

“Carotid ultrasound abnormality” was defined as i) increased ( $\geq 80\%$  sex-specific percentile) carotid IMT (intima-media thickness), a combined standardized measure including information from the internal and common carotid artery OR ii) an extreme increase of the common carotid IMT  $\geq 1$  mm OR iii) significant ( $\geq 25\%$ ) narrowing of the common or internal carotid arteries, consistent with prior publications.<sup>3, 5</sup>

\*Sample size with available BNP levels, n=2902

<sup>†</sup>Sample size with available CRP levels, n=2818

**Supplemental Table 2.** Detailed information regarding individuals on lipid-lowering treatment (LLT)

| LDL (in mg/dL) group                                                                                             | Overall sample (N = 3012) |                         |                         |                          |                         |
|------------------------------------------------------------------------------------------------------------------|---------------------------|-------------------------|-------------------------|--------------------------|-------------------------|
|                                                                                                                  | Group 1:                  | Group 2:                | Group 3:                | Group 4:                 | Group 5:                |
|                                                                                                                  | LDL<100                   | 100≤LDL<130             | LDL<130                 | LDL≥130                  | LDL≥130                 |
|                                                                                                                  | No treatment<br>(N=546)   | No treatment<br>(N=931) | On treatment<br>(N=170) | No treatment<br>(N=1233) | On treatment<br>(N=132) |
| Average LDL levels across exams 1 to 6, mg/dL; mean ± SD                                                         | 93.1 ± 16.7               | 116.7 ± 15.7            | 138.8 ± 21.7            | 143.6 ± 21.9             | 168.5 ± 23.9            |
| Individuals on lipid-lowering treatment (LLT) at exam 6, n (%)                                                   | 0                         | 0                       | 170 (100.0)             | 0                        | 132 (100.0)             |
| Individuals on statins at exam 6, n (%)                                                                          | 0                         | 0                       | 140 (82.4)              | 0                        | 84 (63.6)               |
| Individuals on LLT, but not on statins at exam 6, n (%)                                                          | 0                         | 0                       | 30 (17.6)               | 0                        | 48 (36.4)               |
| Average duration of LLT (statin+non-statin), years ± SD                                                          |                           |                         | 4.6 ± 3.6               |                          | 5.1 ± 3.5               |
| Average LDL levels across all those exams <b>BEFORE</b> lipid-lowering treatment was initiated, mg/dL, mean ± SD |                           |                         | 150.4 ± 27.5            |                          | 175.4 ± 30.6            |

LLT indicates lipid-lowering treatment (statins + non-statins).

The duration of lipid-lowering treatment (LLT) was estimated by taking as start date of LLT the middle of the time period between the last exam without LLT and the first exam where LLT was noted.

**Supplemental Figure**

**Supplemental Figure 1.** 10-year probability of a CVD event according to LDL group<sup>6</sup> (baseline risk)

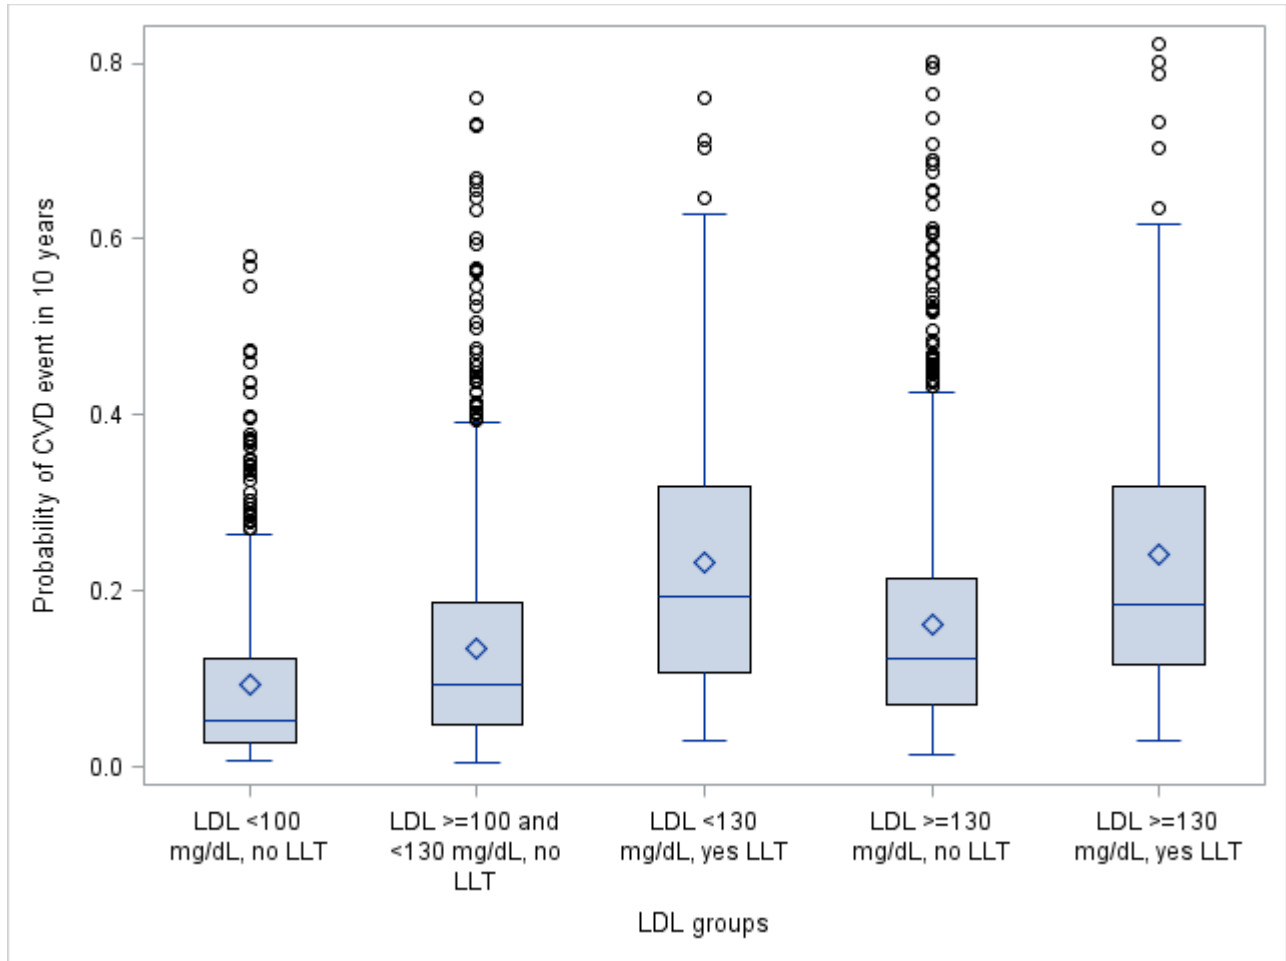

The horizontal line in the box indicates the median; the diamond reflects the mean.

## Supplemental References

1. Andersson C, Lyass A, Vasan RS, et al. Long-term risk of cardiovascular events across a spectrum of adverse major plasma lipid combinations in the Framingham Heart Study. *Am Heart J* 2014;168(6):878-83 e1.
2. Lieb W, Pencina MJ, Lanier KJ, et al. Association of parental obesity with concentrations of select systemic biomarkers in nonobese offspring: the Framingham Heart Study. *Diabetes* 2009;58(1):134-7.
3. Ingelsson E, Sullivan LM, Murabito JM, et al. Prevalence and prognostic impact of subclinical cardiovascular disease in individuals with the metabolic syndrome and diabetes. *Diabetes* 2007;56(6):1718-26.
4. Fox CS, Cupples LA, Chazaro I, et al. Genomewide linkage analysis for internal carotid artery intimal medial thickness: evidence for linkage to chromosome 12. *Am J Hum Genet* 2004;74(2):253-61.
5. Lieb W, Enserro DM, Sullivan LM, et al. Residual Cardiovascular Risk in Individuals on Blood Pressure-Lowering Treatment. *J Am Heart Assoc* 2015;4(11)
6. D'Agostino RB, Sr., Vasan RS, Pencina MJ, et al. General cardiovascular risk profile for use in primary care: the Framingham Heart Study. *Circulation* 2008;117(6):743-53.
